# Supplementary material
Source: PubMed Central journal article supplement (PMC4900454)
Supplement: NIHMS790032-supplement-data_tables.pdf [file NIHMS790032-supplement-data_tables.pdf]

Appendix 1: Percentile WATI values as a function of frequency for three age groups

| Frequency (Hz) | Percentile (ESG units) |         |          |          |          |            |        |          |          |          |        |         |         |         |         |
|----------------|------------------------|---------|----------|----------|----------|------------|--------|----------|----------|----------|--------|---------|---------|---------|---------|
|                | 2-3 months             |         |          |          |          | 3-6 months |        |          |          |          | adults |         |         |         |         |
|                | 90                     | 75      | median   | 25       | 10       | 90         | 75     | median   | 25       | 10       | 90     | 75      | median  | 25      | 10      |
| 201            | 443.72                 | 403.23  | -1711.92 | -1446.92 | -1440.77 | 191.38     | 260.82 | -1300.00 | -1479.50 | -202.77  | 51.85  | 337.85  | -555.62 | -748.31 | 894.17  |
| 364            | 381.18                 | 370.30  | -278.10  | -664.01  | -1273.25 | 1072.63    | 291.07 | -669.75  | -1279.75 | -1533.00 | 239.80 | -352.62 | -645.37 | -618.89 | -648.73 |
| 458            | 374.835                | 456.65  | 406.15   | -798.83  | -1003.43 | 437.30     | 587.81 | -777.43  | -1038.76 | -1249.33 | 211.09 | -298.19 | -870.05 | -422.63 | -561.35 |
| 578            | 264.95                 | -411.04 | -528.89  | 408.04   | 807.00   | 364.27     | 462.26 | 434.31   | -793.73  | -884.62  | 164.23 | -229.74 | -289.03 | -331.83 | -454.18 |
| 728            | 251.27                 | 371.10  | -481.06  | -428.00  | 433.80   | 329.33     | 374.63 | -470.50  | 426.04   | -789.69  | 123.67 | -182.56 | -200.60 | -270.03 | -351.13 |
| 917            | -224.67                | -328.03 | -428.70  | -518.80  | 474.63   | -186.83    | 281.35 | -382.00  | -621.50  | -648.34  | 66.40  | -140.41 | -179.95 | -217.33 | -264.36 |
| 1155           | -146.82                | -203.80 | -278.79  | -381.79  | 514.48   | -110.76    | 188.00 | -270.50  | -388.68  | -551.31  | 27.80  | -108.14 | -140.20 | -179.89 | -214.46 |
| 1422           | -33.67                 | -89.24  | -152.26  | -207.00  | 376.11   | 20.74      | -61.33 | -178.83  | 273.20   | -401.89  | 40.19  | -62.80  | -121.30 | -162.43 | -194.00 |
| 1824           | 74.26                  | 20.23   | -61.00   | -150.13  | 279.40   | 80.86      | 3.28   | -60.17   | -176.63  | -317.26  | 42.84  | -78.17  | -110.18 | -144.54 | -174.22 |
| 2319           | 208.27                 | 143.01  | 61.94    | -24.85   | -101.11  | 172.35     | 82.90  | 12.66    | -73.63   | -183.87  | 18.59  | -51.81  | -76.95  | -108.45 | -154.89 |
| 2913           | 340.79                 | 251.45  | 154.00   | 78.89    | 6.81     | 219.79     | 121.56 | 23.20    | -57.01   | -174.80  | 17.38  | -137.07 | -164.61 | -209.30 | -308.00 |
| 3688           | 578.19                 | 324.79  | 111.23   | 13.16    | -64.80   | 182.77     | 89.87  | 28.82    | -32.79   | -126.63  | 68.23  | 13.36   | -47.21  | -81.07  | -124.86 |
| 4622           | 921.16                 | 487.27  | 123.76   | 53.45    | -33.48   | 259.79     | 172.97 | 102.18   | 27.47    | -32.56   | 83.06  | 46.00   | 21.04   | -37.80  | -84.88  |
| 5823           | 132.35                 | 185.13  | 135.15   | 61.65    | -31.18   | 278.82     | 172.29 | 111.89   | 41.75    | -27.81   | 116.67 | 78.22   | 44.78   | 6.80    | -24.41  |
| 7326           | 590.33                 | 337.65  | 144.43   | 73.93    | 24.18    | 337.24     | 248.17 | 143.33   | 81.15    | 7.32     | 188.45 | 109.47  | 80.79   | 28.03   | 3.22    |

Appendix 1 (continued): Percentile WAZP values as a function of frequency for three age groups

| Frequency (no) | 2-3 months |        |         |        | 3-9 months |        |        |        | adults |        |        |        |        |       |       |
|----------------|------------|--------|---------|--------|------------|--------|--------|--------|--------|--------|--------|--------|--------|-------|-------|
|                | 90         | 75     | Median  | 25     | 10         | 90     | 75     | Median | 25     | 10     | 90     | 75     | Median | 25    | 10    |
| 400            | 170.20     | 159.83 | 142.97  | 102.03 | 97.03      | 171.92 | 162.64 | 145.25 | 104.60 | 100.00 | 184.83 | 165.64 | 127.90 | 98.82 | 63.00 |
| 364            | 174.53     | 179.50 | 175.89  | 160.19 | 160.80     | 167.82 | 159.54 | 155.23 | 147.03 | 144.46 | 207.65 | 143.03 | 106.74 | 78.72 | 55.81 |
| 458            | 170.51     | 161.89 | 1484.68 | 405.00 | 315.48     | 194.21 | 406.52 | 338.54 | 242.56 | 189.34 | 206.23 | 160.71 | 118.66 | 88.44 | 61.64 |
| 528            | 194.60     | 178.80 | 155.08  | 100.70 | 100.68     | 145.34 | 112.84 | 103.89 | 246.16 | 170.60 | 103.20 | 100.19 | 112.10 | 82.83 | 56.22 |
| 728            | 180.50     | 169.41 | 158.88  | 140.16 | 147.87     | 151.99 | 148.46 | 126.13 | 233.96 | 178.48 | 191.26 | 155.86 | 118.18 | 85.41 | 68.91 |
| 917            | 162.58     | 122.73 | 117.24  | 109.93 | 265.16     | 488.06 | 350.88 | 275.93 | 214.23 | 165.95 | 187.14 | 155.88 | 100.73 | 80.88 | 69.33 |
| 1105           | 158.74     | 115.94 | 100.71  | 270.04 | 213.76     | 400.18 | 326.85 | 248.93 | 197.00 | 146.91 | 208.24 | 162.20 | 122.83 | 85.36 | 66.39 |
| 1405           | 161.64     | 178.87 | 201.21  | 232.78 | 178.78     | 278.61 | 282.25 | 211.89 | 161.31 | 135.68 | 200.94 | 163.20 | 115.48 | 81.82 | 58.88 |
| 1834           | 165.83     | 122.71 | 248.54  | 203.01 | 163.41     | 332.32 | 256.43 | 206.33 | 161.93 | 121.85 | 174.88 | 160.70 | 91.37  | 65.62 | 44.01 |
| 2311           | 175.68     | 164.75 | 236.74  | 183.18 | 150.80     | 340.11 | 277.90 | 200.75 | 158.63 | 119.19 | 139.57 | 91.44  | 61.26  | 44.22 | 31.21 |
| 2811           | 160.15     | 146.28 | 262.19  | 211.80 | 133.62     | 460.98 | 374.70 | 240.26 | 183.88 | 115.88 | 96.66  | 60.32  | 45.18  | 35.68 | 24.62 |
| 3668           | 151.23     | 187.81 | 288.14  | 215.52 | 154.74     | 302.68 | 224.08 | 154.47 | 108.03 | 77.82  | 84.38  | 50.63  | 33.74  | 23.31 | 15.71 |
| 4822           | 126.42     | 230.56 | 165.36  | 104.26 | 74.68      | 258.04 | 167.49 | 124.58 | 88.18  | 57.31  | 55.73  | 33.47  | 22.03  | 11.81 | 7.22  |
| 5883           | 178.62     | 171.00 | 103.05  | 56.88  | 33.74      | 183.89 | 107.81 | 60.06  | 40.46  | 21.20  | 37.28  | 21.04  | 12.32  | 6.41  | 2.41  |
| 7236           | 140.81     | 87.67  | 40.41   | 18.72  | 10.35      | 100.00 | 38.02  | 26.88  | 12.16  | 6.68   | 60.71  | 24.74  | 12.22  | 6.74  | 4.09  |

Appendix 1 (continued): Permissible WATF values as a function of frequency for three age groups

| Frequency (Hz) | Energy Referenced |      |        |      |            |      |      |        |        |      |      |      |        |      |      |
|----------------|-------------------|------|--------|------|------------|------|------|--------|--------|------|------|------|--------|------|------|
|                | 0-9 months        |      |        |      | 0-9 months |      |      |        | adults |      |      |      |        |      |      |
|                | 90                | 75   | Median | 25   | 10         | 90   | 75   | Median | 25     | 10   | 90   | 75   | Median | 25   | 10   |
| 200            | 0.28              | 0.33 | 0.37   | 0.42 | 0.57       | 0.25 | 0.30 | 0.33   | 0.42   | 0.57 | 0.37 | 0.45 | 0.53   | 0.64 | 0.79 |
| 364            | 0.81              | 0.76 | 0.66   | 0.52 | 0.39       | 0.83 | 0.89 | 0.82   | 0.75   | 0.65 | 0.95 | 0.94 | 0.90   | 0.85 | 0.79 |
| 498            | 0.73              | 0.68 | 0.58   | 0.44 | 0.34       | 0.89 | 0.85 | 0.77   | 0.67   | 0.56 | 0.94 | 0.92 | 0.85   | 0.77 | 0.71 |
| 576            | 0.64              | 0.58 | 0.52   | 0.42 | 0.33       | 0.85 | 0.79 | 0.69   | 0.57   | 0.49 | 0.91 | 0.88 | 0.79   | 0.69 | 0.61 |
| 728            | 0.63              | 0.56 | 0.48   | 0.41 | 0.32       | 0.79 | 0.70 | 0.60   | 0.49   | 0.39 | 0.86 | 0.81 | 0.70   | 0.58 | 0.48 |
| 937            | 0.59              | 0.51 | 0.42   | 0.34 | 0.27       | 0.71 | 0.64 | 0.51   | 0.40   | 0.29 | 0.80 | 0.74 | 0.62   | 0.51 | 0.39 |
| 1155           | 0.55              | 0.38 | 0.29   | 0.22 | 0.15       | 0.65 | 0.54 | 0.39   | 0.27   | 0.16 | 0.74 | 0.64 | 0.54   | 0.43 | 0.32 |
| 1465           | 0.35              | 0.23 | 0.18   | 0.10 | 0.05       | 0.57 | 0.41 | 0.26   | 0.15   | 0.08 | 0.70 | 0.59 | 0.49   | 0.41 | 0.31 |
| 1834           | 0.26              | 0.18 | 0.09   | 0.05 | 0.03       | 0.50 | 0.25 | 0.14   | 0.08   | 0.04 | 0.67 | 0.58 | 0.46   | 0.36 | 0.24 |
| 2311           | 0.26              | 0.17 | 0.10   | 0.05 | 0.03       | 0.41 | 0.24 | 0.13   | 0.08   | 0.04 | 0.61 | 0.47 | 0.35   | 0.24 | 0.15 |
| 2915           | 0.41              | 0.29 | 0.17   | 0.10 | 0.05       | 0.28 | 0.25 | 0.19   | 0.10   | 0.05 | 0.46 | 0.37 | 0.25   | 0.10 | 0.05 |
| 3668           | 0.34              | 0.24 | 0.16   | 0.10 | 0.06       | 0.47 | 0.25 | 0.13   | 0.07   | 0.04 | 0.51 | 0.33 | 0.19   | 0.08 | 0.04 |
| 4622           | 0.51              | 0.34 | 0.19   | 0.09 | 0.04       | 0.63 | 0.40 | 0.19   | 0.07   | 0.03 | 0.80 | 0.58 | 0.34   | 0.19 | 0.10 |
| 5823           | 0.73              | 0.56 | 0.35   | 0.19 | 0.08       | 0.80 | 0.60 | 0.40   | 0.20   | 0.11 | 0.92 | 0.60 | 0.42   | 0.42 | 0.25 |
| 7336           | 0.90              | 0.81 | 0.69   | 0.41 | 0.21       | 0.93 | 0.87 | 0.71   | 0.57   | 0.39 | 0.93 | 0.89 | 0.77   | 0.61 | 0.47 |
